# Supplementary material
Source: Research Square preprint supplement (doi:10.21203/rs.3.rs-5645775/v1)
Supplement: Supplementary file 1 [file 97dd4a2adfd0510be92a8a90.docx]

**Table 1.** Sarcopenia Prevention and Intervention Program for the Elderly

| Factor | Contents | Session | Method |
| --- | --- | --- | --- |
| Information | Knowledge provision  - Body changes in old age  - Diagnosis of sarcopenia  - Factors causing sarcopenia  - Risk of sarcopenia  - Dietary education to prevent sarcopenia  - Protein and vitamin D diet  - How to write a food diary and evaluation  - Diet  - Exercise to prevent sarcopenia  - Exercises you can do at home  - How to write an exercise plan | 1～12 | Group  education,  Watch video,  Booklet |
| Motivation | Self-awareness  - Awareness of one's own body changes  - Self-diagnosis of sarcopenia  - Recognition of factors causing sarcopenia  - Recognition of the risk of sarcopenia  - Understanding your diet  - Be aware of your diet  - Recognize the exercise method that is right for you  - Share your own workout plans  - Discuss changes in physical condition during the participation process  - Share your diet and exercise plan  Dietary diary evaluation  - Share your food diary  - Share your dietary problems  - Plan your own diet  - Share improvement goals  - Share your goals after evaluating your diet | 1～12  6～12 | Individual  counseling,  Feedback,  Discussion,  Experience  sharing |
| Behavioral skills | Food composition  - Diet to prevent sarcopenia  - Protein and vitamin D diet  - Dietary journaling and evaluation  - Awareness of the condition and sharing the  will to improve  Exercise  - Warm-up exercise, upper body exercise (elastic band exercise), lower body exercise (whole body vibration exercise), cool-down exercise  - Write an exercise log and evaluate it | 6～12  1～12 | Discussion,  Individual  counseling,  Feedback,  Diet sharing,  Diet diary  Exercise |

**Table 2.** Homogeneity of General Characteristic and Dependent Variables (*n* = 50)

| **Characteristics** | **Categories** | **Total**  **(n = 50)** | **Exp.**  **(n = 25)** | **Cont.**  **(n = 25)** | ***χ*²**  **/Fisher/t** | ***p*** |
| --- | --- | --- | --- | --- | --- | --- |
| **n (%)** | **n (%)** | **n (%)** |
|  |  |  |  |  |  |  |
| Age(yr) | 65~69 | 21 (42.0) | 13 (52.0) | 8 (32.0) | 3.40† | .386 |
|  | 70~74 | 25 (50.0) | 11 (44.0) | 14 (56.0) |  |  |
|  | 75~79 | 2 (4.0) | 0 (0.0) | 2 (8.0) |  |  |
|  | ≥ 80 | 2 (4.0) | 1 (4.0) | 1 (4.0) |  |  |
| Gender | Female | 35 (70.0) | 14 (56.0) | 21 (84.0) | 4.67 | .062 |
|  | Male | 15 (30.0) | 11 (44.0) | 4 (16.0) |  |  |
| Marital status | Married | 37 (74.0) | 21 (84.0) | 16 (64.0) | 2.60 | .196 |
|  | Bereavement | 13 (26.0) | 4 (16.0) | 9 (36.0) |  |  |
| Living together | Yes | 37 (74.0) | 21 (84.0) | 16 (64.0) | 2.60 | .196 |
|  | No | 13 (26.0) | 4 (16.0) | 9 (36.0) |  |  |
| Education level | ≤ Elementary school | 18 (36.0) | 5 (20.0) | 13 (52.0) | 7.94† | .065 |
|  | ≤ Middle school | 13 (26.0) | 6 (24.0) | 7 (28.0) |  |  |
|  | ≤ High school | 11 (22.0) | 8 (32.0) | 3 (12.0) |  |  |
|  | ≤ College | 7 (14.0) | 5 (20.0) | 2 (8.0) |  |  |
|  | ≥ Graduate school | 1 (2.0) | 1 (4.0) | 0 (0.0) |  |  |
| Occupation | Yes | 27 (54.0) | 16 (64.0) | 11 (44.0) | 2.01 | .256 |
|  | No | 23 (46.0) | 9 (36.0) | 14 (56.0) |  |  |
| Muscle mass |  |  |  |  |  |  |
|  | ≥ Cutoff |  | 24 (96.0) | 25 (100.0) | 1.000†† | .729 |
|  | < Cutoff |  | 1 (4.0) | 0 (0.0) |  |  |
| Muscle strength |  |  |  |  |  |  |
|  | ≥ Cutoff |  | 21 (84.0) | 20 (80.0) | 1.000†† | .165 |
|  | < Cutoff |  | 4 (16.0) | 5 (20.0) |  |  |
| Physical performance |  |  |  |  |  |  |
| ≥ Cutoff |  | 13 (52.0) | 10 (40.0) | 0.32† | .570 |
|  | < Cutoff |  | 12 (48.0) | 15 (60.0) |  |  |
| Sarcopenia quality of life | Average |  | 80.46±11.07 | 76.39±10.90 | 1.31§ | .196 |
| Cont. = Control group; Exp. = Experimental group; SarQoL = Sarocopenia and quality of life  †Chi-square test; ††Fisher’s exact test; §Independent t-test | | | | | | |

**Table 3.** Effects of Sarcopenia Prevention and Intervention Program in the Elderly (*n*=50)

| **Variables** | **Categories** | **Group** | | **OR (95% CI)** | ***p*** |
| --- | --- | --- | --- | --- | --- |
| **Exp. (n=25)** | **Cont. (n=25)** |
| **n (%)** | |
| Muscle mass | Maintain† | 24 (96.0) | 25 (100.0) | reference | 1.000 |
| Improvement§ | 1 (4.0) | 0 (0.0) | 3.12 (0.12-80.40) |  |
| Muscle strength | Deterioration†† | 0 (0.0) | 2 (8.0) | 0.20 (0.01-4.42) | .153 |
| Maintain† | 21 (84.0) | 21 (84.0) | reference |
| Improvement§ | 4 (16.0) | 2 (8.0) | 2.00 (0.33-12.12) |
| Physical performance | Deterioration†† | 0 (0.0) | 2 (8.0) | 0.27 (0.01-6.07) | .002 |
| Maintain† | 16 (64.0) | 22 (88.0) | reference |
| Improvement§ | 9 (36.0) | 1 (4.0) | 12.38 (1.42-107.74) |
| Number of diagnosis of sarcopenia | Increase|| | 0 (0.0) | 4 (16.0) | 0.16 (0.01-3.33) | <.001 |
| No change¶ | 12 (48.0) | 18 (72.0) | reference |
| Decrease# | 13 (52.0) | 3 (12.0) | 6.50 (1.52-27.78) |
| Cont. = Control group; Exp. = Experimental group; OR = Odds Ratio; CI = Confidence Interval  †Maintain : The state in which there is no change before and after the cutoff  ††Deterioration: A decrease from more than the pre-cutoff to less than the post-cutoff  §Improvement: An increase from below the pre-cutoff to above the post-cutoff  ||Increase: Iecrease in number below cutoff  ¶No change: No change in the number below the threshold  #Decrease: Decrease in number below cutoff | | | | | |

**Table 4.** Differences in Sarcopenia Quality of Life between Two Groups (*n*=50)

| **Group** | **Pre-test** | **Post-test** | **t** | ***p*** | **Mean differences (Post-Pre)** | **t** | ***p*** |
| --- | --- | --- | --- | --- | --- | --- | --- |
| **M±SD** | | **M±SD** |
| Exp.  (n=25) | 80.46±11.07 | 86.68±8.73 | 5.82 | <.001 | 6.22±5.16 | 8.02 | <.001 |
| Cont.  (n=25) | 76.39±10.90 | 68.60±12.85 |  |  | -7.79±7.04 |  |  |
| Cont. = Control group; Exp. = Experimental group | | | | | | | |
